# Supplementary material
Source: publisher figshare collection journal article supplement (https://acs.figshare.com/ndownloader/files/3889675)
Supplement: Supplementary file 1 [file 3889675]

data_global 
_audit_creation_date        "14-04-17"
_audit_creation_method CRYSTALS_ver_14.40

_oxford_structure_analysis_title  'analytical in P n a 21'
_chemical_name_systematic         ?
_chemical_melting_point           ?

#looking for refcif 
 
 
# Check this file using the IUCr facility at: 
# http://checkcif.iucr.org/ 
 
# The content below is held in the file 'script/refcif.dat'. This is a text 
# file which you may edit to reflect local conditions. 
# Items which need looking at are represented by a '?'. 
# Items for which there are choices are prefixed with 'choose from'. 
 
_publ_contact_letter 
; 
 Please consider this CIF submission for 
 publication as a Short Format Paper in Acta 
 Crystallographica E. 
; 
_publ_contact_author_name         'Anthony Other' 
_publ_contact_author_address 
; 
 Chemical Crystallography Laboratory, 
 Department of Chemistry, 
 University of Nowhere, 
 Nowhere, NO1 4T, UK. 
; 
 
_publ_contact_author_phone        '+44 1865 000000' 
_publ_contact_author_fax          '+44 1865 000000' 
_publ_contact_author_email        'a.n.other@chem.no.ac.uk' 
_publ_requested_journal           'Section E' 
_publ_requested_category          EO # choose from: FI FM FO CI CM CO AD 
_publ_requested_coeditor_name     'Prof William Clegg' 
 
_publ_section_title 
# Title of paper - generally just the systematic or trivial name 
; ? 
; 
 
# The loop structure below should contain the names and addresses of all 
# authors, in the required order of publication. Repeat as necessary. 
loop_ 
 _publ_author_name 
 _publ_author_address 
 _publ_author_footnote 
 'Other, Anthony N.' # Author 1 
; 
 ? # Address for author 1 
; 
; 
 ? # Footnote for author 1 
; 
 'Else, S. O.' # Author 2 
; 
 ? # Address 2 
; 
; 
 ? # Footnote 2 
; 
 
 
_publ_section_abstract 
# Text of the abstract 
# (a) The Abstract must be self-contained and comprehensible 
# without the rest of the paper. This means no references 
# to atom names or to compound numbers; compounds must be 
# identified as the title compound, or by name or by some other 
# means such as derivatives of each other (e.g. "the 
# corresponding ketone"). 
# (b) The chemical formula of "the title compound" must be given. 
# (c) Any crystallographic molecular symmetry should be 
# mentioned, and also the presence of more than one molecule 
# in the asymmetric unit (i.e. anything other than Z'=1). 
; 
? 
; 
 
_publ_section_related_literature  # Not in version 2.3.1 
############################################################### 
# Essential references (e.g. to the origin of the material studied, related 
# structural studies, and to information supporting the reported structure) 
# should be cited in this section, with appropriate very brief explanatory 
# text, for example `The synthesis of the complex is described by Jones 
# (2001). The anhydrous complex has essentially the same coordination 
# geometry (Smith, 2003).' In addition, all references included in the 
# supplementary materials, but not elsewhere in the published article, 
# should be given here. The simple text `For related literature, see:...' 
# may be used, but further details should be provided in the Comment 
# section, which forms part of the supplementary material. 
############################################################### 
; 
? 
; 
 
_publ_section_comment 
# Text of the paper 
# Note that atoms are referenced as N2, not N(2) or N~2~ 
# If text containing () occur within (), the outer ones should be [] 
# Figures should be referenced as Fig. 
; 
? 
; 
_publ_section_acknowledgements    # Acknowledgments 
; 
? 
; 
_publ_section_figure_captions 
# Captions to figures - Start each caption on a new line after a blank line 
; 
Fig. 1. 
The title compound with displacement ellipsoids drawn at the 50% 
probability level. H atoms are shown as spheres of 
arbitary radius. 
 
; 
 
 
_publ_section_exptl_refinement 
# Some potentially useful phrases are donated by Bill Clegg: 
; 
In the absence of significant anomalous scattering, Friedel pairs were 
merged. 
 
The absolute configuration was arbitrarily assigned. 
 
The relatively large ratio of minimum to maximum corrections applied 
in the multiscan process (1:nnn) reflect changes in the illuminated 
volume of the crystal. 
 
Changes in illuminated volume were kept to a minimum, and were 
taken into account (G\"orbitz, 1999) by the multi-scan inter-frame 
scaling (DENZO/SCALEPACK, Otwinowski & Minor, 1997). 
 
 
G\"orbitz, C. H. (1999). Acta Cryst. B55, 1090-1098. 
 
 
 
 
The H atoms were all located in a difference map, but those 
attached to carbon atoms were repositioned geometrically. 
The H atoms were initially refined with soft restraints on the 
bond lengths and angles to regularise their geometry 
(C---H in the range 0.93--0.98, 
N---H in the range 0.86--0.89 
N---H to 0.86 
O---H = 0.82 
\%A) 
and 
U~iso~(H) (in the range 1.2-1.5 times U~eq~ of the parent atom), 
after which the positions were refined with riding constraints 
(Cooper et al, 2010). 
 
Cooper, R. I., Thompson, A. L. & Watkin, D. J. (2010). J. Appl. Cryst. 
43, 1100-1107. 
 
; 
 
_publ_section_exptl_prep 
# Brief details or a reference. Include solvent if known 
; 
? 
; 
 
# Hand-made tables can be put in the cif. The number of columns 
# is set in the loop header. 
# The contants of each column can either be a piece of text 
# without any spaces (eg a number) or other text enclosed in " " 
# Remove the leading # in the following example 
 
#geom_extra_table_head_A 
#; 
#Table 2. 
#Molecular parameters deviating most from MOGUL averages 
#; 
# 
#loop_ 
#_geom_extra_tableA_col_1 
#_geom_extra_tableA_col_2 
#_geom_extra_tableA_col_3 
#_geom_extra_tableA_col_4 
# 
#Parameter "Observed Value" "MOGUL Value" "MOGUL e.s.d" 
#N5-C6-C4 129 124 "7 (\%)" 
#C3-O10-C2 105 109 "2 (\%)" 
#C6-O7 1.25 1.22 ".02 (\%A)" 
# 
 
data_1 
 
_exptl_special_details 
; 
 The crystal was 
placed in the cold stream of an Oxford 
Cryosystems open-flow nitrogen cryostat (Cosier & 
Glazer, 1986) with a nominal stability of 0.1K. 
 
Cosier, J. & Glazer, A.M., 1986. J. Appl. Cryst. 105-107. 
; 
_refine_special_details 
; 
? 
; 
#--------------------------------------------------------------- 
# _oxford_ data items, April 2010: 
# There is some uncertainty about the correct way of forming local data 
# names, e.g. 
 
# _atom_site_special_shape_oxford 
# or 
# _oxford_atom_site_special_shape 
 
# see: 
# http://www.iucr.org/resources/cif/spec/version1.1/semantics#namespace 
 
# A reserved prefix, e.g. foo, must be used in the following way 
# " If the data file contains items defined in a DDL1 dictionary, the 
# local data names assigned under the reserved prefix must contain it as 
# their first component, e.g. _foo_atom_site_my_item. " 
 
# However, this seems to say the opposite: 
# http://www.iucr.org/__data/iucr/cif/standard/cifstd8.html 
 
# According to advice from the IUCr, CRYSTALS is correct 
#--------------------------------------------------------------- 
# End of 'script/refcif.dat' 
#end of refcif 
_cell_length_a                  8.7161(4) 
_cell_length_b                  44.918(2) 
_cell_length_c                  5.2061(3) 
_cell_angle_alpha               90.0 
_cell_angle_beta                90.0 
_cell_angle_gamma               90.0 
_cell_volume                    2038.22(19) 
 
_symmetry_cell_setting            'orthorhombic' 
_symmetry_space_group_name_H-M    'P n a 21 ' 
_symmetry_space_group_name_Hall   ? 
loop_
 _symmetry_equiv_pos_as_xyz
 'x,y,z'
 '-x+1/2,y+1/2,z+1/2'
 'x+1/2,-y+1/2,z'
 '-x,-y,z+1/2'

loop_
_atom_type_symbol
_atom_type_scat_dispersion_real
_atom_type_scat_dispersion_imag
_atom_type_scat_Cromer_Mann_a1
_atom_type_scat_Cromer_Mann_b1
_atom_type_scat_Cromer_Mann_a2
_atom_type_scat_Cromer_Mann_b2
_atom_type_scat_Cromer_Mann_a3
_atom_type_scat_Cromer_Mann_b3
_atom_type_scat_Cromer_Mann_a4
_atom_type_scat_Cromer_Mann_b4
_atom_type_scat_Cromer_Mann_c
_atom_type_scat_source  
 C       0.0033   0.0016   2.3100  20.8439   1.0200  10.2075   1.5886   0.5687
   0.8650  51.6512   0.2156 'International Tables Vol C 4.2.6.8 and 6.1.1.4'
 H       0.0000   0.0000   0.4930  10.5109   0.3229  26.1257   0.1402   3.1424
   0.0408  57.7998   0.0030 'International Tables Vol C 4.2.6.8 and 6.1.1.4'
 N       0.0061   0.0033  12.2126   0.0057   3.1322   9.8933   2.0125  28.9975
   1.1663   0.5826 -11.5290 'International Tables Vol C 4.2.6.8 and 6.1.1.4'
 O       0.0106   0.0060   3.0485  13.2771   2.2868   5.7011   1.5463   0.3239
   0.8670  32.9089   0.2508 'International Tables Vol C 4.2.6.8 and 6.1.1.4'
 F       0.0171   0.0103   3.5392  10.2825   2.6412   4.2944   1.5170   0.2615
   1.0243  26.1476   0.2776 'International Tables Vol C 4.2.6.8 and 6.1.1.4'
 
 
_cell_formula_units_Z                    4

# Given Formula = C25 H18 F3 N2 O1 
# Dc =      1.37 Fooo =    848.00 Mu =      1.03 M =    419.42
# Found Formula = C24 H19 F3 N2 O1 
# Dc =      1.33 FOOO =    848.00 Mu =      1.01 M =    408.42

_chemical_formula_sum             'C24 H19 F3 N2 O1'
_chemical_formula_moiety          'C24 H19 F3 N2 O1'
_chemical_compound_source                ?
_chemical_formula_weight            408.42
 
 
_cell_measurement_reflns_used         2553
_cell_measurement_theta_min              3
_cell_measurement_theta_max             27
_cell_measurement_temperature          293
 
_exptl_crystal_description        'needle' 
_exptl_crystal_colour             'colorless' 
_exptl_crystal_size_min           0.141 
_exptl_crystal_size_mid           0.226 
_exptl_crystal_size_max           0.872 
 
_exptl_crystal_density_diffrn     1.331 
_exptl_crystal_density_meas       ? 
_exptl_crystal_density_method     'not measured' 
# Non-dispersive F(000): 
_exptl_crystal_F_000              848 
_exptl_absorpt_coefficient_mu     0.101 
 
# Sheldrick geometric approximatio 0.98 0.99 
_exptl_absorpt_correction_type    analytical 
_exptl_absorpt_process_details 
; 
 Analytical Absorption (De Meulenaer & Tompa, 1965) 
; 
_exptl_absorpt_correction_T_min   0.95 
_exptl_absorpt_correction_T_max   0.99 
_diffrn_measurement_device_type   'Oxford Diffraction Gemini' 
_diffrn_measurement_device        'Area' 
_diffrn_radiation_monochromator   'graphite' 
_diffrn_radiation_type            'Mo K\a'
_diffrn_radiation_wavelength           0.71069
_diffrn_measurement_method        \w/2\q 
 
# If a reference occurs more than once, delete the author 
# and date from subsequent references. 
_computing_data_collection        'Gemini, (Oxford Diffraction, 2006)' 
_computing_cell_refinement        'CrysAlis, (Oxford Diffraction, 2002)' 
_computing_data_reduction         'CrysAlis, (Oxford Diffraction, 2002)' 
_computing_structure_solution     'SIR97 (Altomare et al., 1999)' 
_computing_structure_refinement   'CRYSTALS (Betteridge et al., 2003)' 
_computing_publication_material   'CRYSTALS (Betteridge et al., 2003)' 
_computing_molecular_graphics     'CAMERON (Watkin et al., 1996)' 
 
_diffrn_standards_interval_time   . 
_diffrn_standards_interval_count  . 
_diffrn_standards_number          0 
_diffrn_standards_decay_%         ? 
 
_diffrn_ambient_temperature        293
_diffrn_reflns_number             8826 
_reflns_number_total              4342 
_diffrn_reflns_av_R_equivalents   0.021 
# Number of reflections without Friedels Law is 4342 
# Number of reflections with Friedels Law is 1819 
# Theoretical number of reflections is about 2572 
 
 
_diffrn_reflns_theta_min          2.958 
_diffrn_reflns_theta_max          29.056 
_diffrn_measured_fraction_theta_max 0.984 
 
_diffrn_reflns_theta_full         25.278 
_diffrn_measured_fraction_theta_full 0.989 
 
 
_diffrn_reflns_limit_h_min        -11 
_diffrn_reflns_limit_h_max        8 
_diffrn_reflns_limit_k_min        -61 
_diffrn_reflns_limit_k_max        45 
_diffrn_reflns_limit_l_min        -7 
_diffrn_reflns_limit_l_max        5 
_reflns_limit_h_min               0 
_reflns_limit_h_max               11 
_reflns_limit_k_min               0 
_reflns_limit_k_max               61 
_reflns_limit_l_min               -7 
_reflns_limit_l_max               5 
 
_oxford_diffrn_Wilson_B_factor    4.46 
_oxford_diffrn_Wilson_scale       0.28 
 
_atom_sites_solution_primary      direct #heavy,direct,difmap,geom
# _atom_sites_solution_secondary  difmap
_atom_sites_solution_hydrogens    difmap
 
_refine_diff_density_min          -0.21 
_refine_diff_density_max          0.31 
 
 
# The current dictionary definitions do not cover the 
# situation where the reflections used for refinement were 
# selected by a user-defined sigma threshold 
 
 
# The values actually used during refinement 
_oxford_reflns_threshold_expression_ref     I>3.0\s(I)
_refine_ls_number_reflns          2575 
_refine_ls_number_restraints      13 
_refine_ls_number_parameters      272 
_oxford_refine_ls_R_factor_ref    0.0502 
_refine_ls_wR_factor_ref          0.0437 
_refine_ls_goodness_of_fit_ref    1.2169 
_refine_ls_shift/su_max           0.0048019 
_refine_ls_shift/su_mean          0.0003853 
 
 
# The values computed with all filters except I/sigma 
_oxford_reflns_number_all         4335 
_refine_ls_R_factor_all           0.0853 
_refine_ls_wR_factor_all          0.0545 
 
# The values computed with a 2 sigma cutoff - a la SHELX 
_reflns_threshold_expression      I>2.0\s(I)
_reflns_number_gt                 3113 
_refine_ls_R_factor_gt            0.0620 
_refine_ls_wR_factor_gt           0.0466 
 
_refine_ls_abs_structure_Flack    0.1(13) 
_refine_ls_abs_structure_details  'Flack (1983), 2523 Friedel-pairs' 
# choose from: rm (reference molecule of known chirality), 
# ad (anomolous dispersion - Flack), rmad (rm and ad), 
# syn (from synthesis), unk (unknown) or . (not applicable). 
_chemical_absolute_configuration  'ad' 
 
 
_refine_ls_structure_factor_coef  F 
_refine_ls_matrix_type            full
_refine_ls_hydrogen_treatment     noref          #undef, noref, refall,
                                                 # refxyz, refU, constr or mixed
_refine_ls_weighting_scheme       calc 
_refine_ls_weighting_details 
;
 Method, part 1, Chebychev polynomial, (Watkin, 1994, Prince, 1982) 
 [weight] = 1.0/[A~0~*T~0~(x)+A~1~*T~1~(x) ... +A~n-1~]*T~n-1~(x)] 
 where A~i~ are the Chebychev coefficients listed below and x= Fcalc/Fmax 
 Method = Robust Weighting (Prince, 1982) 
 W = [weight] * [1-(deltaF/6*sigmaF)^2^]^2^ 
 A~i~ are: 
 3.43 -0.941 2.60 
;
# Insert your own references if required - in alphabetical order 
_publ_section_references 
; 
Altomare, A., Burla, M.C., Camalli, M., Cascarano, G.L., Giacovazzo, C., 
Guagliardi, A., Grazia, A., Moliterni, G., Polidori, G. & Spagna, R. 
(1999). J. App. Cryst. 32, 115-119. 
 
Betteridge, P.W., Carruthers, J.R., Cooper, R.I., 
Prout, K. & Watkin, D.J. (2003). J. Appl. Cryst. 36, 1487. 
 
De Meulenaer, J. & Tompa, H. (1965). Acta Cryst. 19, 1014. 
 
Flack, H. D. (1983). Acta Cryst. A39, 876-881. 
 
Oxford Diffraction, (2010). CrysAlisPro. 
 
Oxford Diffraction, (2006). Gemini User Manual. 
 
Prince, E. 
Mathematical Techniques in Crystallography 
and Materials Science 
Springer-Verlag, New York, 1982. 
 
Watkin D.J. (1994). 
Acta Cryst, A50, 411-437. 
 
Watkin, D.J., Prout, C.K. & Pearce, L.J. (1996). CAMERON, Chemical 
Crystallography Laboratory, Oxford, UK. 
; 

# Uequiv = arithmetic mean of Ui i.e. Ueqiv = (U1+U2+U3)/3

# Replace last . with number of unfound hydrogen atoms attached to an atom.

# ..._refinement_flags_... 
# . no refinement constraints           S special position constraint on site
# G rigid group refinement of site      R riding atom
# D distance or angle restraint on site T thermal displacement constraints
# U Uiso or Uij restraint (rigid bond)  P partial occupancy constraint


loop_
_atom_site_label
_atom_site_type_symbol
_atom_site_fract_x
_atom_site_fract_y
_atom_site_fract_z
_atom_site_U_iso_or_equiv
_atom_site_occupancy
_atom_site_adp_type
_atom_site_refinement_flags_posn
_atom_site_refinement_flags_adp
_atom_site_refinement_flags_occupancy
_atom_site_disorder_assembly
_atom_site_disorder_group
_atom_site_attached_hydrogens
F1 F -0.0814(3) 0.56541(7) 0.6998(7) 0.1414 1.0000 Uani . U . . . . 
C2 C 0.0163(4) 0.55034(8) 0.8324(9) 0.0738 1.0000 Uani . U . . . . 
F3 F -0.0462(3) 0.54936(8) 1.0607(6) 0.1379 1.0000 Uani . . . . . . 
F4 F 0.0077(3) 0.52290(6) 0.7605(9) 0.1591 1.0000 Uani . U . . . . 
C5 C 0.1723(3) 0.56217(6) 0.8389(7) 0.0520 1.0000 Uani . . . . . . 
C6 C 0.2931(3) 0.55164(6) 1.0056(6) 0.0548 1.0000 Uani . . . . . . 
C7 C 0.4195(3) 0.56842(7) 0.9366(7) 0.0599 1.0000 Uani . . . . . . 
O8 O 0.3849(2) 0.58810(4) 0.7433(5) 0.0605 1.0000 Uani . . . . . . 
C9 C 0.2333(3) 0.58386(6) 0.6848(6) 0.0556 1.0000 Uani . . . . . . 
C10 C 0.1670(3) 0.60267(7) 0.4900(6) 0.0572 1.0000 Uani . . . . . . 
N11 N 0.2530(3) 0.62149(5) 0.3720(6) 0.0650 1.0000 Uani . . . . . . 
N12 N 0.1929(4) 0.63970(6) 0.1983(6) 0.0788 1.0000 Uani . . . . . . 
C13 C 0.0343(5) 0.63785(7) 0.1183(7) 0.0722 1.0000 Uani . . . . . . 
C14 C -0.0811(3) 0.64827(7) 0.3125(6) 0.0593 1.0000 Uani . . . . . . 
C15 C -0.0641(4) 0.67498(7) 0.4374(7) 0.0626 1.0000 Uani . . . . . . 
C16 C -0.1691(4) 0.68514(8) 0.6149(8) 0.0784 1.0000 Uani . . . . . . 
C17 C -0.2937(5) 0.66808(10) 0.6765(9) 0.0925 1.0000 Uani . . . . . . 
C18 C -0.3156(5) 0.64135(11) 0.5555(11) 0.1012 1.0000 Uani . . . . . . 
C19 C -0.2086(5) 0.63125(9) 0.3755(10) 0.0919 1.0000 Uani . . . . . . 
C20 C 0.3043(5) 0.65557(8) 0.0364(8) 0.0944 1.0000 Uani . . . . . . 
C21 C 0.2999(4) 0.68836(8) 0.0774(7) 0.0657 1.0000 Uani . . . . . . 
C22 C 0.2187(6) 0.70680(9) -0.0739(9) 0.1033 1.0000 Uani . . . . . . 
C23 C 0.2086(7) 0.73738(11) -0.0352(12) 0.1213 1.0000 Uani . . . . . . 
C24 C 0.2802(8) 0.74935(12) 0.1520(14) 0.1210 1.0000 Uani . . . . . . 
C25 C 0.3660(8) 0.73333(15) 0.3074(14) 0.1409 1.0000 Uani . . . . . . 
C26 C 0.3773(6) 0.70176(13) 0.2776(11) 0.1176 1.0000 Uani . . . . . . 
C27 C 0.5617(4) 0.56553(9) 1.0523(9) 0.0813 1.0000 Uani . . . . . . 
C28 C 0.5706(4) 0.54474(10) 1.2466(10) 0.0905 1.0000 Uani . . . . . . 
C29 C 0.4461(5) 0.52798(8) 1.3253(8) 0.0837 1.0000 Uani . . . . . . 
C30 C 0.3062(4) 0.53077(7) 1.2033(8) 0.0669 1.0000 Uani . . . . . . 
H101 H 0.0604 0.6009 0.4523 0.0717 1.0000 Uiso . . . . . . 
H132 H 0.0215 0.6490 -0.0409 0.0915 1.0000 Uiso . . . . . . 
H131 H 0.0116 0.6164 0.0752 0.0912 1.0000 Uiso . . . . . . 
H151 H 0.0227 0.6874 0.3923 0.0798 1.0000 Uiso . . . . . . 
H161 H -0.1547 0.7053 0.6978 0.0997 1.0000 Uiso . . . . . . 
H171 H -0.3632 0.6756 0.8100 0.1164 1.0000 Uiso . . . . . . 
H181 H -0.4025 0.6301 0.5983 0.1328 1.0000 Uiso . . . . . . 
H191 H -0.2202 0.6123 0.2986 0.1135 1.0000 Uiso . . . . . . 
H201 H 0.2903 0.6499 -0.1507 0.1212 1.0000 Uiso . . . . . . 
H202 H 0.4058 0.6477 0.0803 0.1227 1.0000 Uiso . . . . . . 
H221 H 0.1656 0.6991 -0.2183 0.1319 1.0000 Uiso . . . . . . 
H231 H 0.1448 0.7495 -0.1413 0.1444 1.0000 Uiso . . . . . . 
H241 H 0.2691 0.7712 0.1819 0.1490 1.0000 Uiso . . . . . . 
H251 H 0.4255 0.7425 0.4403 0.1548 1.0000 Uiso . . . . . . 
H261 H 0.4363 0.6912 0.3961 0.1447 1.0000 Uiso . . . . . . 
H271 H 0.6470 0.5777 0.9997 0.1015 1.0000 Uiso . . . . . . 
H281 H 0.6691 0.5422 1.3337 0.1100 1.0000 Uiso . . . . . . 
H291 H 0.4576 0.5138 1.4685 0.1028 1.0000 Uiso . . . . . . 
H301 H 0.2184 0.5181 1.2532 0.0855 1.0000 Uiso . . . . . . 
loop_
_atom_site_aniso_label
_atom_site_aniso_U_11
_atom_site_aniso_U_22
_atom_site_aniso_U_33
_atom_site_aniso_U_23
_atom_site_aniso_U_13
_atom_site_aniso_U_12
F1 0.0655(14) 0.175(3) 0.183(3) 0.090(2) -0.0330(17) -0.0468(15) 
C2 0.0488(18) 0.0591(18) 0.114(3) 0.013(2) 0.005(2) -0.0142(15) 
F3 0.0658(13) 0.231(3) 0.117(2) 0.018(2) 0.0254(15) -0.0506(18) 
F4 0.1043(17) 0.1001(17) 0.273(4) -0.065(2) 0.028(2) -0.0529(14) 
C5 0.0433(14) 0.0485(14) 0.064(2) -0.0134(15) 0.0133(15) -0.0065(12) 
C6 0.0493(17) 0.0477(15) 0.067(2) -0.0154(16) 0.0135(15) 0.0000(14) 
C7 0.0462(17) 0.0533(17) 0.080(2) -0.0156(18) 0.0107(16) 0.0000(14) 
O8 0.0451(11) 0.0540(11) 0.0825(17) -0.0062(12) 0.0125(11) -0.0104(9) 
C9 0.0496(16) 0.0455(14) 0.072(2) -0.0124(16) 0.0178(16) -0.0013(13) 
C10 0.0590(18) 0.0448(15) 0.068(2) -0.0083(16) 0.0110(18) -0.0052(14) 
N11 0.0735(16) 0.0471(13) 0.074(2) -0.0062(14) 0.0291(16) -0.0028(14) 
N12 0.091(2) 0.0661(17) 0.079(2) 0.0169(17) 0.0251(18) 0.0040(15) 
C13 0.109(3) 0.0608(19) 0.047(2) 0.0023(16) 0.006(2) 0.0028(19) 
C14 0.0682(19) 0.0561(16) 0.054(2) 0.0062(17) -0.0025(17) -0.0034(15) 
C15 0.0666(19) 0.0609(18) 0.060(2) 0.0069(17) 0.0052(17) -0.0040(16) 
C16 0.082(2) 0.070(2) 0.083(3) -0.001(2) 0.007(2) 0.013(2) 
C17 0.070(2) 0.107(3) 0.100(3) 0.026(3) 0.020(2) 0.011(2) 
C18 0.064(2) 0.105(3) 0.135(4) 0.038(3) 0.006(3) -0.015(2) 
C19 0.088(3) 0.079(2) 0.108(3) 0.003(2) -0.009(3) -0.019(2) 
C20 0.122(3) 0.073(2) 0.088(3) 0.004(2) 0.061(3) -0.013(2) 
C21 0.068(2) 0.074(2) 0.056(2) 0.0056(18) 0.0195(19) -0.0100(18) 
C22 0.139(4) 0.075(2) 0.096(3) 0.011(2) -0.041(3) -0.034(3) 
C23 0.139(5) 0.082(3) 0.143(5) 0.037(3) -0.031(4) -0.021(3) 
C24 0.141(5) 0.090(3) 0.132(5) -0.006(4) 0.035(4) -0.026(3) 
C25 0.165(5) 0.119(4) 0.139(5) -0.029(4) -0.039(5) -0.056(4) 
C26 0.111(3) 0.141(4) 0.101(4) 0.024(4) -0.021(3) -0.023(3) 
C27 0.0513(19) 0.087(3) 0.106(3) -0.027(3) -0.001(2) -0.0043(18) 
C28 0.064(2) 0.100(3) 0.107(4) -0.018(3) -0.011(2) 0.021(2) 
C29 0.089(3) 0.079(2) 0.083(3) -0.008(2) 0.003(3) 0.018(2) 
C30 0.064(2) 0.0620(19) 0.074(3) -0.0036(19) 0.0141(19) 0.0071(15) 

_refine_ls_extinction_method 
    'None'
_oxford_refine_ls_scale 2.481(5) 
loop_
 _geom_bond_atom_site_label_1
 _geom_bond_site_symmetry_1
 _geom_bond_atom_site_label_2
 _geom_bond_site_symmetry_2
 _geom_bond_distance
 _geom_bond_publ_flag
F1 . C2 . 1.289(4)    yes
C2 . F3 . 1.308(5)    yes
C2 . F4 . 1.290(4)    yes
C2 . C5 . 1.460(4)    yes
C5 . C6 . 1.444(4)    yes
C5 . C9 . 1.370(4)    yes
C6 . C7 . 1.382(4)    yes
C6 . C30 . 1.397(5)    yes
C7 . O8 . 1.373(4)    yes
C7 . C27 . 1.384(5)    yes
O8 . C9 . 1.369(4)    yes
C9 . C10 . 1.441(4)    yes
C10 . N11 . 1.286(4)    yes
C10 . H101 . 0.953    no
N11 . N12 . 1.327(4)    yes
N12 . C13 . 1.446(5)    yes
N12 . C20 . 1.470(4)    yes
C13 . C14 . 1.501(5)    yes
C13 . H132 . 0.974    no
C13 . H131 . 1.010    no
C14 . C15 . 1.373(5)    yes
C14 . C19 . 1.388(5)    yes
C15 . C16 . 1.378(5)    yes
C15 . H151 . 0.968    no
C16 . C17 . 1.367(5)    yes
C16 . H161 . 1.012    no
C17 . C18 . 1.369(6)    yes
C17 . H171 . 0.983    no
C18 . C19 . 1.398(7)    yes
C18 . H181 . 0.936    no
C19 . H191 . 0.946    no
C20 . C21 . 1.489(5)    yes
C20 . H201 . 1.014    no
C20 . H202 . 0.979    no
C21 . C22 . 1.345(6)    yes
C21 . C26 . 1.380(6)    yes
C22 . C23 . 1.391(6)    yes
C22 . H221 . 0.948    no
C23 . C24 . 1.276(8)    yes
C23 . H231 . 0.954    no
C24 . C25 . 1.316(8)    yes
C24 . H241 . 0.998    no
C25 . C26 . 1.430(8)    yes
C25 . H251 . 0.957    no
C26 . H261 . 0.933    no
C27 . C28 . 1.379(6)    yes
C27 . H271 . 0.964    no
C28 . C29 . 1.383(6)    yes
C28 . H281 . 0.977    no
C29 . C30 . 1.381(5)    yes
C29 . H291 . 0.986    no
C30 . H301 . 0.989    no
loop_
 _geom_angle_atom_site_label_1
 _geom_angle_site_symmetry_1
 _geom_angle_atom_site_label_2
 _geom_angle_site_symmetry_2
 _geom_angle_atom_site_label_3
 _geom_angle_site_symmetry_3
 _geom_angle
 _geom_angle_publ_flag
F1 . C2 . F3 . 103.2(3)    yes
F1 . C2 . F4 . 108.0(4)    yes
F3 . C2 . F4 . 102.0(4)    yes
F1 . C2 . C5 . 115.9(3)    yes
F3 . C2 . C5 . 112.3(4)    yes
F4 . C2 . C5 . 114.1(3)    yes
C2 . C5 . C6 . 125.0(3)    yes
C2 . C5 . C9 . 127.4(3)    yes
C6 . C5 . C9 . 107.6(3)    yes
C5 . C6 . C7 . 104.3(3)    yes
C5 . C6 . C30 . 136.2(3)    yes
C7 . C6 . C30 . 119.5(3)    yes
C6 . C7 . O8 . 111.5(3)    yes
C6 . C7 . C27 . 123.3(4)    yes
O8 . C7 . C27 . 125.2(3)    yes
C7 . O8 . C9 . 106.6(2)    yes
C5 . C9 . O8 . 110.1(3)    yes
C5 . C9 . C10 . 132.3(3)    yes
O8 . C9 . C10 . 117.5(3)    yes
C9 . C10 . N11 . 119.2(3)    yes
C9 . C10 . H101 . 119.1    no
N11 . C10 . H101 . 121.7    no
C10 . N11 . N12 . 120.0(3)    yes
N11 . N12 . C13 . 122.5(3)    yes
N11 . N12 . C20 . 115.4(3)    yes
C13 . N12 . C20 . 119.6(3)    yes
N12 . C13 . C14 . 115.4(3)    yes
N12 . C13 . H132 . 109.0    no
C14 . C13 . H132 . 109.6    no
N12 . C13 . H131 . 107.8    no
C14 . C13 . H131 . 108.4    no
H132 . C13 . H131 . 106.2    no
C13 . C14 . C15 . 121.3(3)    yes
C13 . C14 . C19 . 121.6(3)    yes
C15 . C14 . C19 . 117.1(3)    yes
C14 . C15 . C16 . 122.4(3)    yes
C14 . C15 . H151 . 118.1    no
C16 . C15 . H151 . 119.4    no
C15 . C16 . C17 . 119.9(4)    yes
C15 . C16 . H161 . 120.1    no
C17 . C16 . H161 . 120.0    no
C16 . C17 . C18 . 119.6(4)    yes
C16 . C17 . H171 . 117.5    no
C18 . C17 . H171 . 122.8    no
C17 . C18 . C19 . 120.0(4)    yes
C17 . C18 . H181 . 118.3    no
C19 . C18 . H181 . 121.7    no
C18 . C19 . C14 . 120.9(4)    yes
C18 . C19 . H191 . 120.3    no
C14 . C19 . H191 . 118.8    no
N12 . C20 . C21 . 112.3(3)    yes
N12 . C20 . H201 . 110.5    no
C21 . C20 . H201 . 112.5    no
N12 . C20 . H202 . 106.7    no
C21 . C20 . H202 . 110.4    no
H201 . C20 . H202 . 104.0    no
C20 . C21 . C22 . 122.6(4)    yes
C20 . C21 . C26 . 121.8(4)    yes
C22 . C21 . C26 . 115.5(4)    yes
C21 . C22 . C23 . 123.8(4)    yes
C21 . C22 . H221 . 119.8    no
C23 . C22 . H221 . 116.4    no
C22 . C23 . C24 . 119.7(5)    yes
C22 . C23 . H231 . 121.1    no
C24 . C23 . H231 . 119.2    no
C23 . C24 . C25 . 121.2(5)    yes
C23 . C24 . H241 . 119.1    no
C25 . C24 . H241 . 119.8    no
C24 . C25 . C26 . 121.0(5)    yes
C24 . C25 . H251 . 121.2    no
C26 . C25 . H251 . 117.8    no
C25 . C26 . C21 . 118.8(5)    yes
C25 . C26 . H261 . 118.1    no
C21 . C26 . H261 . 123.1    no
C7 . C27 . C28 . 115.7(3)    yes
C7 . C27 . H271 . 120.9    no
C28 . C27 . H271 . 123.4    no
C27 . C28 . C29 . 122.8(4)    yes
C27 . C28 . H281 . 117.9    no
C29 . C28 . H281 . 119.3    no
C28 . C29 . C30 . 120.5(4)    yes
C28 . C29 . H291 . 119.7    no
C30 . C29 . H291 . 119.8    no
C6 . C30 . C29 . 118.1(3)    yes
C6 . C30 . H301 . 121.2    no
C29 . C30 . H301 . 120.7    no


_iucr_refine_instruction_details_constraints
;
#
# Punched on 17/04/14 at 14:36:18
#
#LIST     12                                                                    
BLOCK SCALE X'S, U'S 
CONT ENANTIO 
END                                                                             
;


_iucr_refine_instruction_details_restraints
;
#
# Punched on 17/04/14 at 14:36:18
#
#LIST     16                                                                    
NO 
REM   HREST   START (DO NOT REMOVE THIS LINE) 
REM   HREST   END (DO NOT REMOVE THIS LINE) 
U(IJ)'S  0.0, 0.010000 = F(1) TO C(2) 
U(IJ)'S  0.0, 0.010000 = C(2) TO F(4) 
END                                                                             
;

# Manually omitted reflections

loop_
_oxford_refln_omitted_index_h
_oxford_refln_omitted_index_k
_oxford_refln_omitted_index_l
_oxford_refln_omitted_flag
_oxford_refln_omitted_details
   0  10   0  x   .
